# Supplementary material
Source: HighWire-hosted journal article supplement (https://cmaj.ca/highwire/filestream/58923/field_highwire_adjunct_files/1/neuro-lipsman-2-at_-final.pdf)
Supplement: neuro-lipsman-2-at_-final.pdf [file neuro-lipsman-2-at_-final.pdf]

**Appendix 2 (as supplied by authors): DBS Studies**

| <b>Study</b>                            | <b>Study Type</b>                                    | <b>Number/Type of Patients</b>         | <b>Control group</b>                                                                                                                                                                                                                                                       | <b>Outcome</b>                                                                                                                                                                                                                                                          |
|-----------------------------------------|------------------------------------------------------|----------------------------------------|----------------------------------------------------------------------------------------------------------------------------------------------------------------------------------------------------------------------------------------------------------------------------|-------------------------------------------------------------------------------------------------------------------------------------------------------------------------------------------------------------------------------------------------------------------------|
| <b>Subcallosal Cingulate Gyrus</b>      |                                                      |                                        |                                                                                                                                                                                                                                                                            |                                                                                                                                                                                                                                                                         |
| Holtzheimer et al. 2012 (1)             | Prospective open label trial with sham lead-in phase | 17 (10 MDD, 7 with bipolar II)         | Single-blind, sham lead-in phase in all patients for 4 weeks after initial implantation. Second sham phase following 24 weeks of active stimulation; abandoned after 3 subjects due to significant deterioration in depressive symptoms after stimulation was discontinued | At one year follow-up, remission and response rate of 36%. At 2 years, remission rate of 58% and response rate of 92%. Remission and response rates based on Hamilton Depression Rating Scale (HDRS). Efficacy similar for MDD and bipolar patients                     |
| Lozano et al. 2012 (2)                  | Prospective open label trial                         | 21 (MDD)                               | No control group                                                                                                                                                                                                                                                           | At 6 months follow-up, response rate of 48%; at one year follow-up, response rate of 29%. Response measured by HDRS                                                                                                                                                     |
| Mayberg et al. 2005 (3)                 | Case series                                          | 5 (MDD, one patient with bipolar II)   | No control group                                                                                                                                                                                                                                                           | Follow-up 6 months. 4/6 responders, 2/6 remission as measured by HDRS                                                                                                                                                                                                   |
| Kennedy et al. 2011 (4)                 | Case series                                          | 20 (MDD, one patients with bipolar II) | No control group                                                                                                                                                                                                                                                           | At last follow-up (3-6 years following implantation, mean=3.5), response rate=64.3% and remission rate=42.9% (by HDRS). Considerable improvement in social functioning: 65% of patients engaged in work-related activity at last follow-up compared to 10% prior to DBS |
| <b>Ventral caudate/Ventral Striatum</b> |                                                      |                                        |                                                                                                                                                                                                                                                                            |                                                                                                                                                                                                                                                                         |
| Malone et al. 2009 (5)                  | Case series                                          | 15 (MDD)                               | No control group                                                                                                                                                                                                                                                           | Follow-up from 6-51 months. 8/15 responders and 6/15 in remission at                                                                                                                                                                                                    |

Appendix to: Lipsman N, Sankar T, Downar J, et al. Neuromodulation for treatment-refractory major depressive disorder. *CMAJ* 2013. DOI:10.1503/cmaj.121317.

Copyright © 2014 The Author(s) or their employer(s).

To receive this resource in an accessible format, please contact us at [cmajgroup@cmaj.ca](mailto:cmajgroup@cmaj.ca)

|                                   |             |                                                                           |                  |                                                                                                                                                                                                                 |
|-----------------------------------|-------------|---------------------------------------------------------------------------|------------------|-----------------------------------------------------------------------------------------------------------------------------------------------------------------------------------------------------------------|
|                                   |             |                                                                           |                  | last follow-up measured by Montgomery-Asberg Depression Scale (MADRS)                                                                                                                                           |
| <b>Nucleus Accumbens</b>          |             |                                                                           |                  |                                                                                                                                                                                                                 |
| Schlaepfer et al. 2008 (6)        | Case series | 3 (MDD)                                                                   | No control group | Double-blind changes to stimulation parameters and assessment. HDRS scores decreased with stimulation and increased with stimulation off.                                                                       |
| Bewernick et al. 2010 (7)         | Case series | 10 (MDD)                                                                  | No control group | At 12 months, 5/10 had achieved >50% reduction in HDRS scores (i.e., responders). Antidepressant, antianhedonic, and antianxiety effects observed                                                               |
| <b>Inferior Thalamic Peduncle</b> |             |                                                                           |                  |                                                                                                                                                                                                                 |
| Jimenez et al. 2005 (8)           | Case report | 1 (MDD with comorbid bulimia nervosa and borderline personality disorder) | No control group | Double-blind assessment protocol following initial period of 8 months with "on" stimulation. No relapse of depressive symptoms with DBS turned off for 12 months. Sustained remission at 24 months with DBS on. |

## References

1. Holtzheimer PE, Kelley ME, Gross RE, et al. Subcallosal cingulate deep brain stimulation for treatment-resistant unipolar and bipolar depression. *Arch Gen Psychiatry* 2012;69:150-8.
2. Lozano AM, Giacobbe P, Hamani C, et al. A multicenter pilot study of subcallosal cingulate area deep brain stimulation for treatment-resistant depression. *J Neurosurg* 2012;116:315-22.
3. Mayberg HS, Lozano AM, Voon V, et al. Deep brain stimulation for treatment-resistant depression. *Neuron* 2005;45:651-60.

4. Kennedy SH, Giacobbe P, Rizvi SJ, et al. Deep brain stimulation for treatment-resistant depression: follow-up after 3 to 6 years. *Am J Psychiatry* 2011;168:502-10.
5. Malone DA Jr, Dougherty DD, Rezai AR, et al. Deep brain stimulation of the ventral capsule/ventral striatum for treatment-resistant depression. *Biol Psychiatry* 2009;65:267-75.
6. Schlaepfer TE, Cohen MX, Frick C, et al. Deep brain stimulation to reward circuitry alleviates anhedonia in refractory major depression. *Neuropsychopharmacology* 2008;33:368-77.
7. Bewernick BH, Hurlemann R, Matusch A, et al. Nucleus accumbens deep brain stimulation decreases ratings of depression and anxiety in treatment-resistant depression. *Biol Psychiatry* 2010;67:110-6.
8. Jiménez F, Velasco F, Salin-Pascual R, et al. A patient with a resistant major depression disorder treated with deep brain stimulation in the inferior thalamic peduncle. *Neurosurgery* 2005;57:585-93.
